# Supplementary material
Source: PubMed Central journal article supplement (PMC2990042)
Supplement: SD5.pdf [file SD5.pdf]

SUPPLEMENTAL TABLE S1

Mosquito species collected and their corresponding numbers and pools screened, July 2007–March 2009 at Bush Bush Forest, Aripo Savannah Scientific Reserve, and Heights of Aripo, Trinidad

| Species                                                          | No. collected | % Of total | No. mosquito pools | No. positive pools |
|------------------------------------------------------------------|---------------|------------|--------------------|--------------------|
| <i>Aedes (Ochlerotatus) fulvus</i> (Wiedemann)                   | 42            | < 0.1      | 20                 | –                  |
| <i>Aedes (Ochlerotatus) hastatus</i> *                           | 2,935         | 1.6        | 106                | –                  |
| <i>Aedes (Ochlerotatus) hortator</i> * (Dyar & Knab)             | 2,464         | 1.3        | 258                | 1                  |
| <i>Aedes (Ochlerotatus) scapularis</i> † (Rondani)               | 6             | < 0.1      | 3                  | –                  |
| <i>Aedes (Ochlerotatus) serratus</i> * (Theobald)                | 16,169        | 8.7        | 830                | –                  |
| <i>Aedes (Howardina) sexlineatus</i> (Theobald)                  | 5             | < 0.1      | 4                  | –                  |
| <i>Aedeomyia (Aedeomyia) squamipennis</i> ‡ (Lynch Arribalzaga)  | 227           | 0.1        | 51                 | –                  |
| <i>Anopheles (Stethomyia) nimbus</i> (Theobald)                  | 389           | 0.2        | 116                | –                  |
| <i>Anopheles</i> spp.                                            | 279           | 0.2        | 53                 | –                  |
| <i>Coquillettidia</i> spp.†                                      | 100           | < 0.1      | 39                 | –                  |
| <i>Coquillettidia (Rhynchoaenia) venezuelensis</i> *§ (Theobald) | 26,405        | 14.2       | 904                | –                  |
| <i>Culex (Aedinus) accelerans</i> ‡ (Root)                       | 96            | < 0.1      | 22                 | –                  |
| <i>Culex (Melanoconion) aikenii</i> §                            | 7,933         | 4.3        | 372                | –                  |
| <i>Culex (Aedinus) amazonensis</i> *§ (Lutz)                     | 1,748         | 0.9        | 96                 | –                  |
| <i>Culex (Melanoconion) caudelli</i> (Dyar & Knab)               | 6,460         | 3.5        | 410                | –                  |
| <i>Culex (Culex) corniger</i> (Theobald)                         | 12            | < 0.1      | 6                  | –                  |
| <i>Culex (Culex) coronator</i> (Dyar & Knab)                     | 8             | < 0.1      | 7                  | –                  |
| <i>Culex (Melanoconion) crybda</i> (Dyar)                        | 61            | < 0.1      | 8                  | –                  |
| <i>Culex (Culex) declarator</i> (Dyar & Knab)                    | 7,952         | 4.3        | 579                | –                  |
| <i>Culex (Culex) nigripalpus</i> (Theobald)                      | 940           | 0.5        | 131                | –                  |
| <i>Culex (Melanoconion) portesi</i> *§ (Senevet & Abonnenc)      | 55,587        | 29.9       | 1423               | 78                 |
| <i>Culex (Melanoconion) spp.</i>                                 | 2,465         | 1.3        | 103                | –                  |
| <i>Culex (Culex) spp.</i>                                        | 159           | 0.1        | 12                 | –                  |
| <i>Culex (Melanoconion) spissipes</i> (Theobald)                 | 3,460         | 1.9        | 241                | 1                  |
| <i>Culex (Melanoconion) pedroi</i> § (Sirivanakarn & Belkin)     | 24,750        | 13.4       | 825                | 1                  |
| <i>Culex (Melanoconion) vomerifer</i> § (Komp)                   | 2,848         | 1.5        | 439                | 2                  |
| <i>Deinocerites</i> spp.†                                        | 137           | < 0.1      | 18                 | –                  |
| <i>Haemagogus janthinomys</i>                                    | 8             | < 0.1      | 5                  | –                  |
| <i>Johnbelkinia magnus</i> (Theobald)                            | 2             | < 0.1      | 1                  | –                  |
| <i>Limatus asulleptus</i> (Theobald)                             | 611           | 0.3        | 124                | –                  |
| <i>Limatus durhamii</i> * (Theobald)                             | 1,047         | 0.6        | 281                | –                  |
| <i>Mansonia</i> spp.                                             | 72            | < 0.1      | 8                  | –                  |
| <i>Mansonia (Mansonia) titillans</i> *§ (Walker)                 | 3,682         | 2.0        | 174                | –                  |
| <i>Orthopodomyia fascipes</i> (Coquillett)                       | 4             | < 0.1      | 3                  | –                  |
| <i>Phoniomyia</i> spp.                                           | 7             | < 0.1      | 5                  | –                  |
| <i>Psorophora (Janthinosoma) albipes</i> * (Theobald)            | 2,935         | 1.6        | 221                | –                  |
| <i>Psorophora (Grabhamia) cingulata</i>                          | 2,689         | 1.5        | 420                | –                  |
| <i>Psorophora (Janthinosoma) ferox</i> * (Humboldt)              | 794           | 0.4        | 145                | –                  |
| <i>Psorophora (Psorophora) lineata</i> (Humboldt)                | 49            | < 0.1      | 34                 | –                  |
| <i>Psorophora (Janthinosoma) lutzii</i> (Theobald)               | 17            | < 0.1      | 13                 | –                  |
| <i>Runchomyia</i> spp.                                           | 4             | < 0.1      | 4                  | –                  |
| <i>Sabethes (Sabethes) cyaneus</i> (Fabricius)                   | 40            | < 0.1      | 11                 | –                  |
| <i>Sabethes (Sabethinus) undosus</i> (Coquillett)                | 479           | 0.3        | 39                 | –                  |
| <i>Trichoprosopon digitatum</i> (Rondani)                        | 315           | 0.2        | 48                 | 1                  |
| <i>Uranotaenia</i> spp.                                          | 3,771         | 2.0        | 118                | –                  |
| <i>Wyeomyia</i> spp.*§                                           | 5,234         | 2.8        | 416                | 1                  |
| Total = 46                                                       | 185,397       | 100.00     | 9,148              | 85                 |

\* < 2% of this species was collected by human landing collections.

† Human landing collections accounted for 6% of *Deinocerites* spp., 33% of *Aedes (Ochlerotatus) scapularis*, and 6% of *Coquillettidia* spp.

‡ Canopy collections accounted for 3% of *Aedeomyia (Aedeomyia) squamipennis* and 21% of *Culex (Aedinus) accelerans* collected.

§ < 1% of this species were collected by canopy collections.
